# Supplementary material for: Extracorporeal shockwave relieves endothelial injury and dysfunction in steroid-induced osteonecrosis of the femoral head via miR-135b targeting FOXO1: in vitro and in vivo studies
Source: Aging (Albany NY). 2022 Jan 7;14(1):410–29. doi: 10.18632/aging.203816 (PMC8791199; doi:10.18632/aging.203816)
Supplement: Supplementary Figures [file aging-14-203816-s001.pdf]

## SUPPLEMENTARY FIGURES

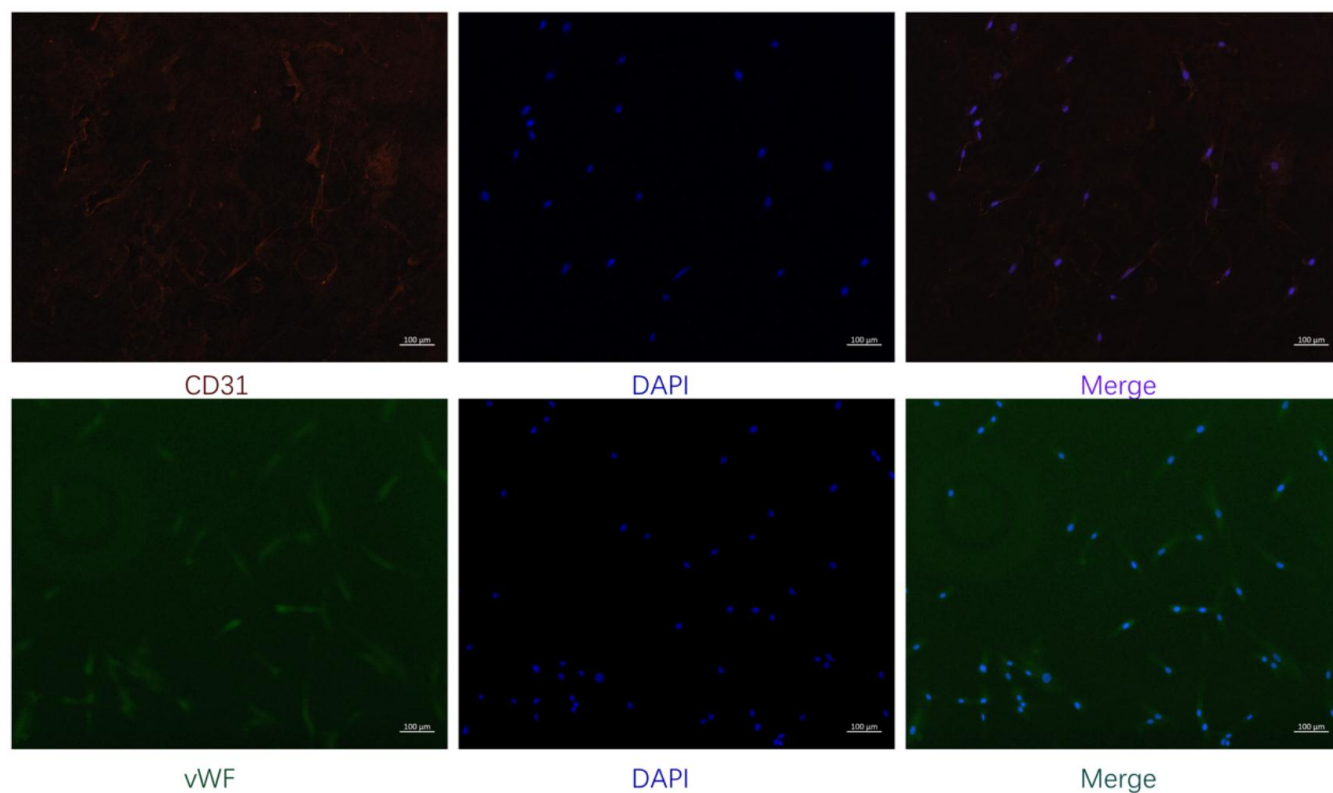

**Supplementary Figure 1. Identification of BMECs.** The representative CD31-positive and vWF-positive cells were identified as BMECs.

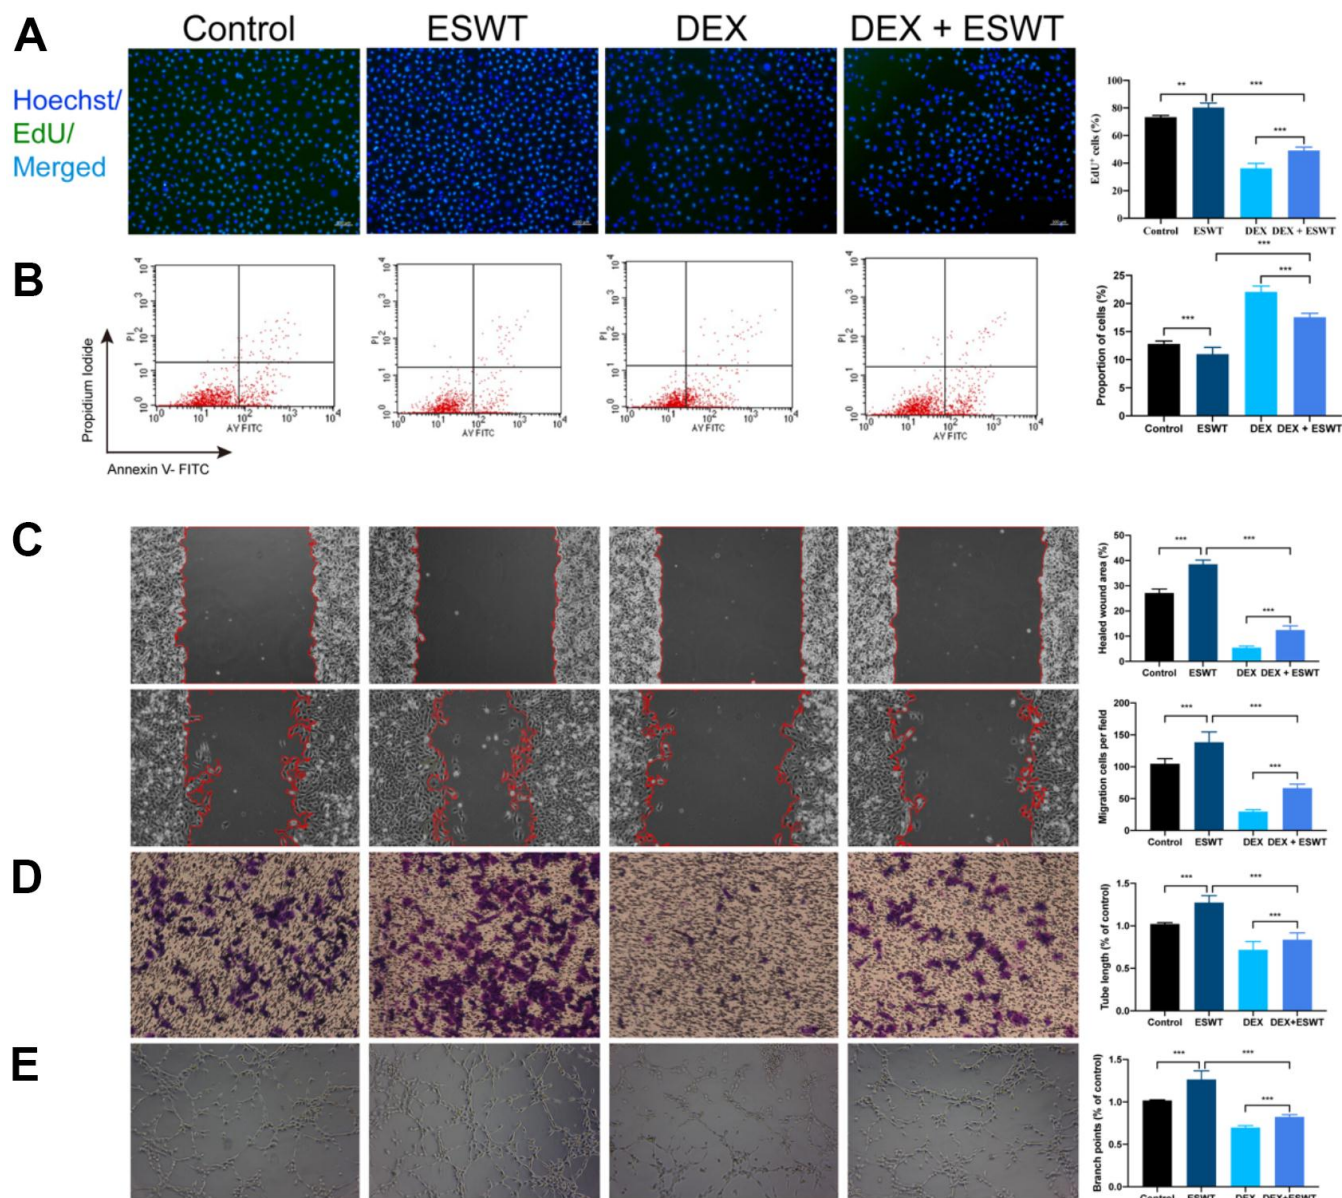

**Supplementary Figure 2. Effect of ESWT on HUVECs treated with GCs.** ECs were subjected to ESWT with 0.05 mJ/mm<sup>2</sup>, 1000 shots followed by DEX with 180  $\mu$ M. (A) cell proliferation confirmed by EdU assay; (B) apoptosis rate of assessed through Annexin V-FITC/PI; (C) migration ability evaluated by wound healing assay; (D) migration ability evaluated by Transwell assay; (E) angiogenesis ability evaluated by tube formation assay. n=3 \*\* P < .01, \*\*\* P < .001.

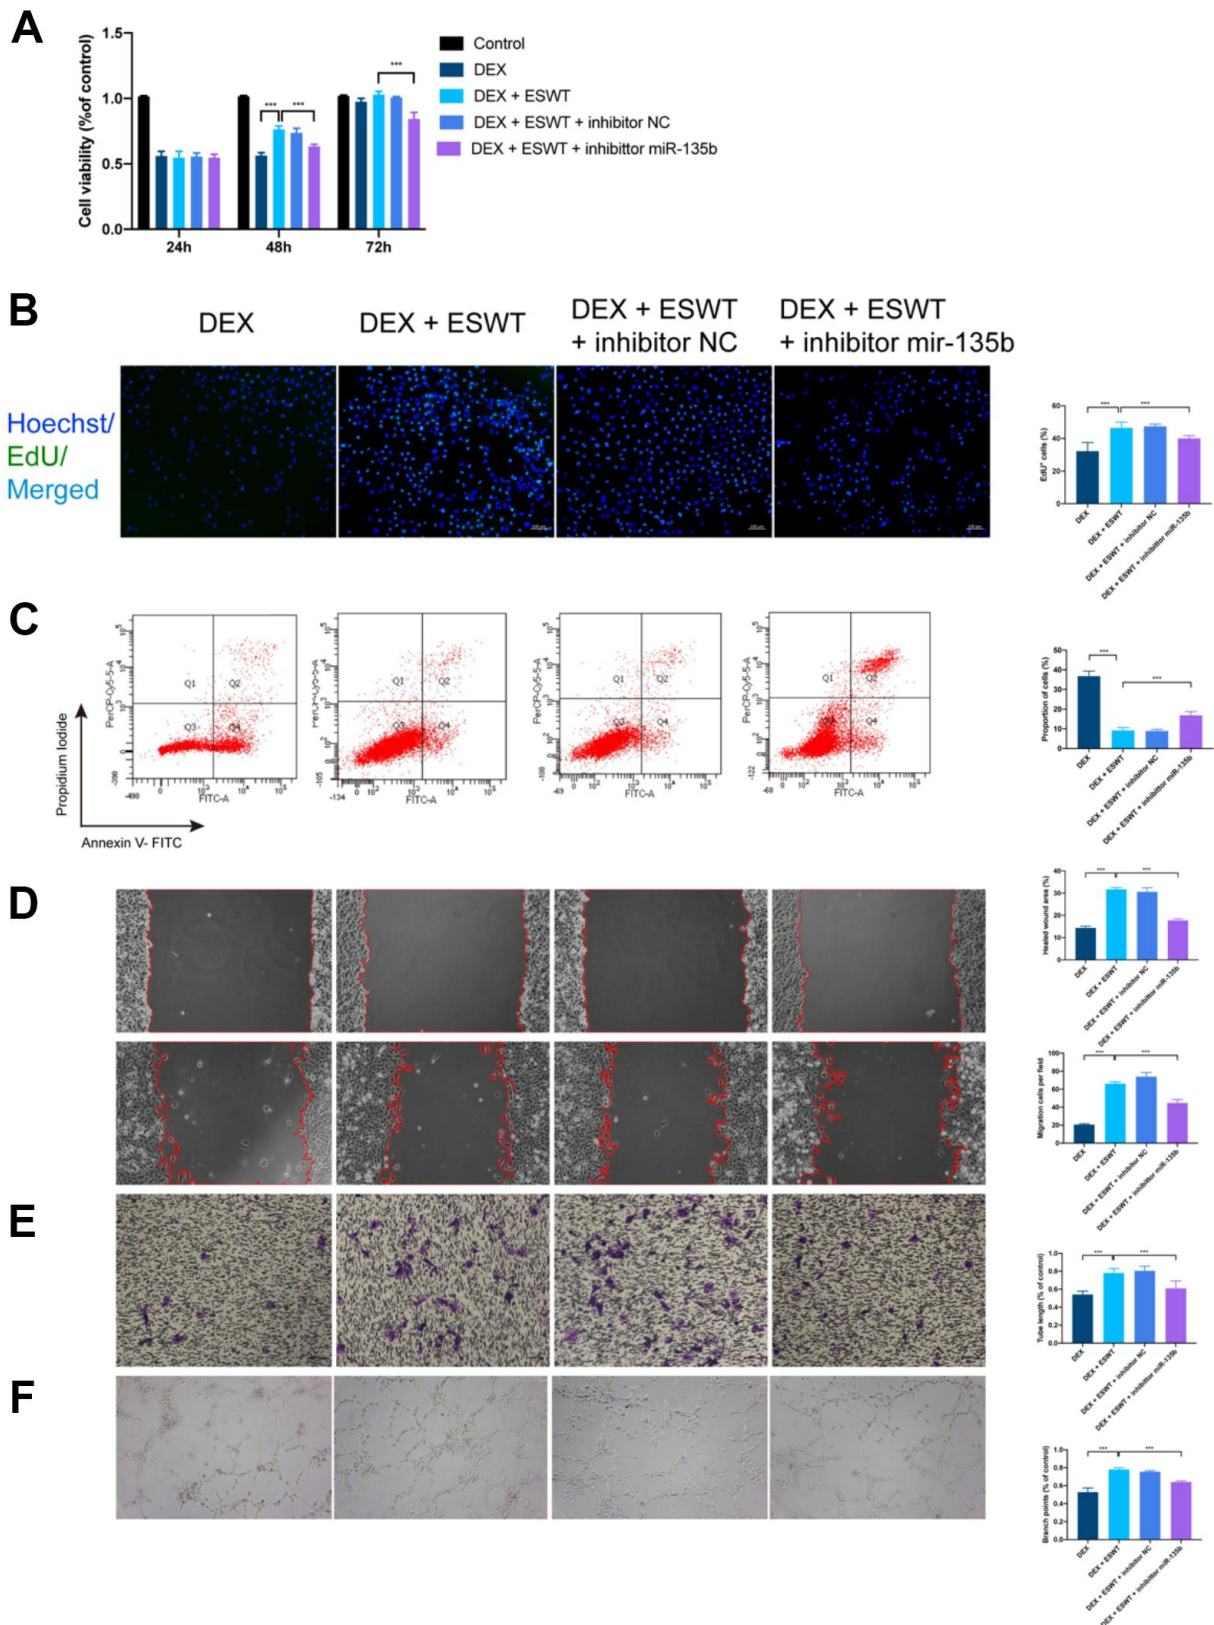

**Supplementary Figure 3. Effect of miR-135b on HUVECs treated with GCs.** After transfection of inhibitor miR-135b, ECs were subjected to ESWT with 0.05 mJ/mm<sup>2</sup>, 1000 shots followed by DEX with 180  $\mu$ M. (A) cell viability examined by CCK-8 analysis; (B) cell proliferation confirmed by EdU assay; (C) apoptosis rate of assessed through Annexin V-FITC/PI; (D) migration ability evaluated by wound healing assay; (E) migration ability evaluated by Transwell assay; (F) angiogenesis ability evaluated by tube formation assay. n=3 \*\*P < .01, \*\*\*P < .001.

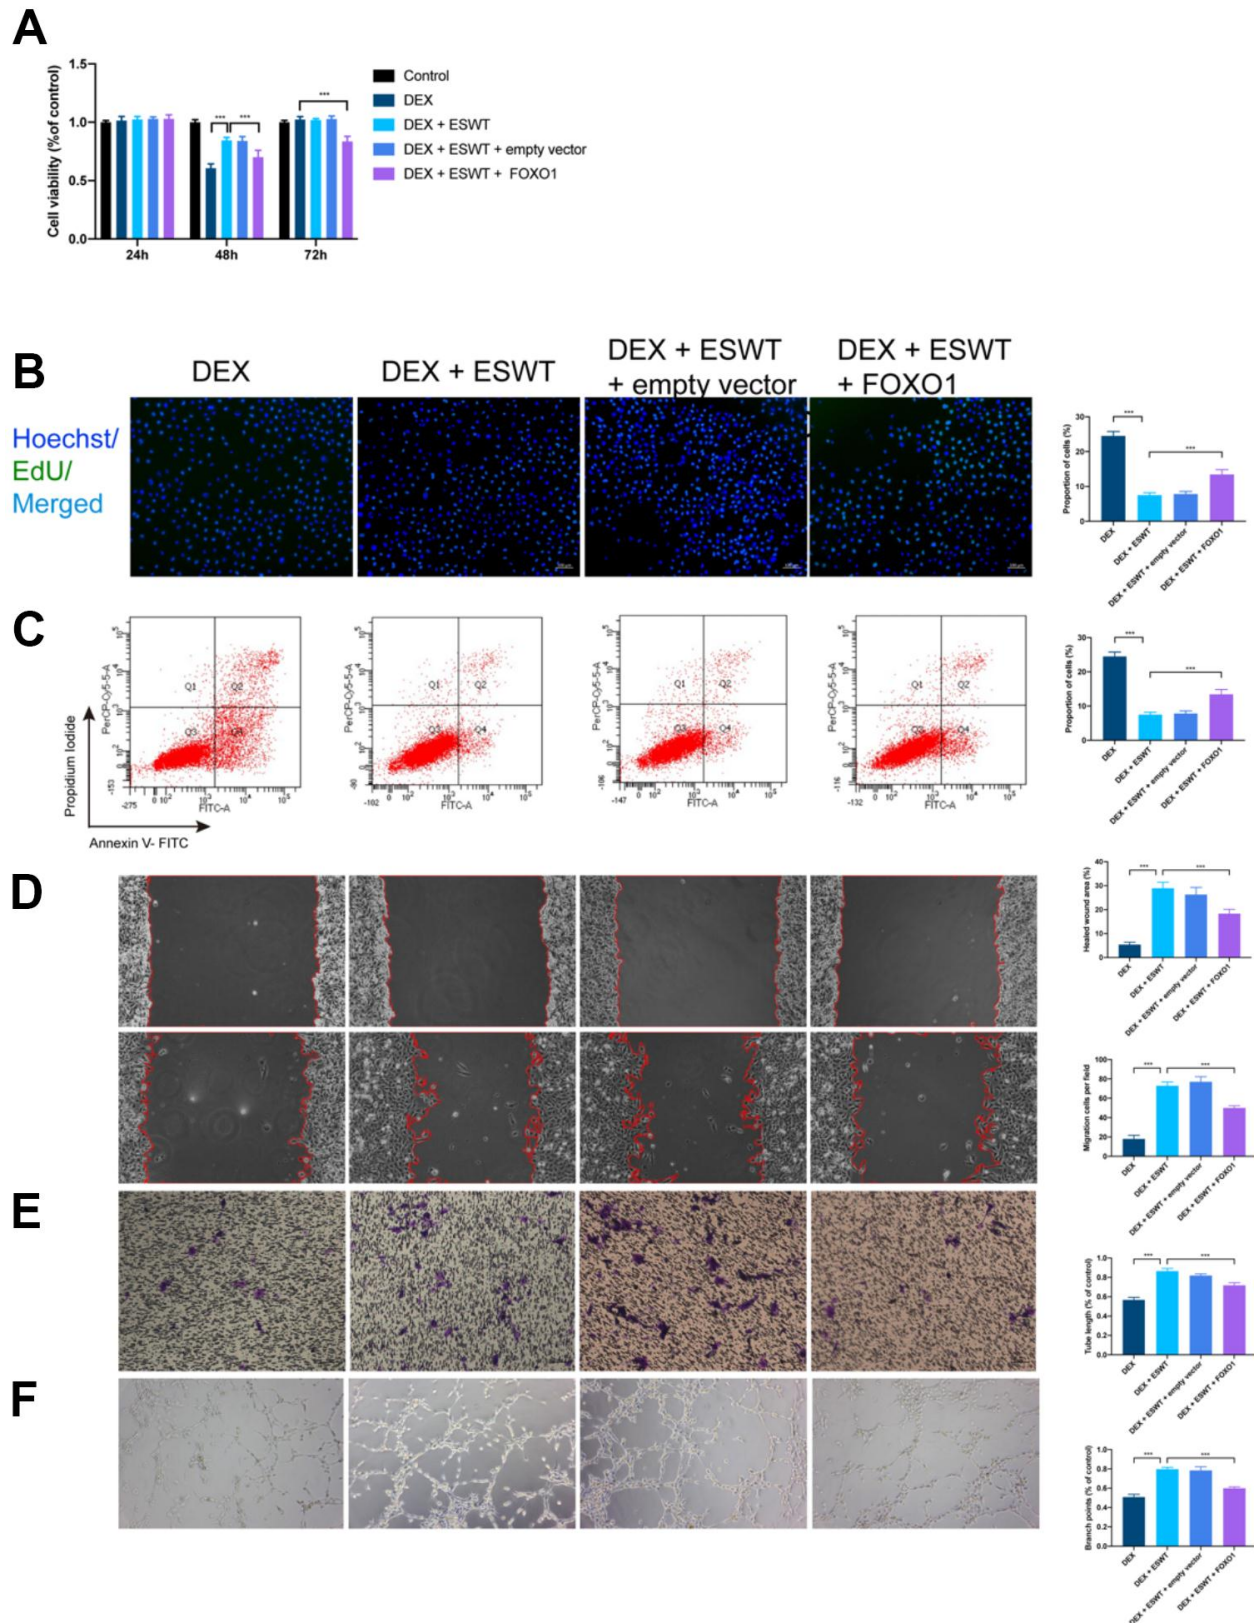

**Supplementary Figure 4. Effect of FOXO1 on HUVECs treated with GCs.** After overexpression of FOXO1, ECs were subjected to ESWT with  $0.05 \text{ mJ/mm}^2$ , 1000 shots followed by DEX with  $180 \mu\text{M}$ . (A) cell viability examined by CCK-8 analysis; (B) cell proliferation confirmed by EdU assay; (C) apoptosis rate of assessed through Annexin V-FITC/PI; (D) migration ability evaluated by wound healing assay; (E) migration ability evaluated by Transwell assay; (F) angiogenesis ability evaluated by tube formation assay.  $n=3$  \*\*  $P < .01$ , \*\*\*  $P < .001$ .
